# Supplementary material
Source: publisher figshare collection journal article supplement (https://wiley.figshare.com/articles/dataset/_/3563406)
Supplement: Supplementary file 1 [file appendix-A.pdf › appendix-A.pdf]

## Appendices

### Appendix A. Including the effectiveness of management actions in deriving the two principles.

The utility function we are seeking to minimize is:

$$U = \sum_{i=1}^S (1 - \omega_i) \delta_i (n_i), \quad s. t. \quad \sum_{i=1}^S \omega_i C_i + n_i M_i \leq B \quad (\text{A.1})$$

where  $S$  is the number of species considered,  $\omega_i$  contains a 1 or 0 depending on whether we allocate resources for remedial conservation action or not,  $\delta_i$  is the probability of decline,  $n_i$  is the number of monitoring surveys,  $C_i$  and  $M_i$  are the cost of taking action and monitoring for species  $i$ , and  $B$  is the total budget. By decline we mean that the long-term population trend (over and above variability) is negative, so that a species would eventually go extinct without action to increase numbers over the long term.

Let  $e_i$  be the effectiveness of a conservation action for species  $i$ , or the degree to which a species' rate of decline is reduced (so that  $e_i = 0$  means the conservation action has no impact on reducing the decline, and  $e_i = 1$  means that the decline is completely arrested). Using the same approach as in the main text:

A. Monitor a species  $i$  for which management action was planned:

$$\begin{aligned} E[-\Delta U] &= \delta_i \frac{-e_b \delta_b M_i}{C_b} + (1 - \delta_i) \left( e_b \delta_b \frac{C_i - M_i}{C_b} \right) \\ E[-\Delta U] &= e_b \delta_b \left( \frac{C_i}{C_b} (1 - \delta_i) - \frac{M_i}{C_b} \right) \end{aligned} \quad (\text{A.2})$$

B. Monitor a species  $i$  for which no management action was planned:

$$E[-\Delta U] = \delta_i \left( e_i - e_b \delta_b \left( \frac{C_i + M_i}{C_b} \right) \right) + (1 - \delta_i) \left( -\frac{e_b \delta_b M_i}{C_b} \right)$$

$$E[-\Delta U] = e_b \delta_b \left( \delta_i \left( \frac{e_i}{e_b \delta_b} - \frac{C_i}{C_b} \right) - \frac{M_i}{C_b} \right). \quad (\text{A.3})$$
